# Supplementary material for: Association between magnesium and vitamin D status in adults with high prevalence of vitamin D deficiency and insufficiency
Source: PubMed Central journal article supplement (PMC11649730; doi:10.1007/s00394-024-03559-9), 2024-12-16
Supplement: 394_2024_3559_MOESM1_ESM.pdf [file 394_2024_3559_MOESM1_ESM.pdf]

## Supplemental Material

### Association of magnesium status with vitamin D status in adults with a high prevalence of vitamin D deficiency and insufficiency

Zittermann A, Zelzer S, Herrmann M, Kleber M, Maerz W, Pilz S

|                                                                                                                                                                            | <b>Page</b> |
|----------------------------------------------------------------------------------------------------------------------------------------------------------------------------|-------------|
| <b>Supplemental Figure 1:</b> Risk scores in matched and unmatched patients with deficient or non-deficient Mg status                                                      | 2           |
| <b>Supplemental Table 1:</b> Summary of methods and test kits used for laboratory analysis and their reference range, and intra- and inter-assay coefficients of variation | 3           |
| <b>Supplemental Table 2:</b> Vitamin D and magnesium status in the entire study cohort and according to different demographic, anthropometric, and clinical parameters     | 4           |
| <b>Supplemental Table 3</b> Results of bootstrapping for the primary endpoint 25-hydroxyvitamin D using 1,000 samples with random replacement                              | 5           |
| <b>Supplemental Table 4:</b> Characteristics of unmatched and matched study participants with deficient/non-deficient or adequate serum Mg status                          | 6           |

**Supplemental Figure 1:** Risk scores in matched and unmatched patients with deficient or non-deficient Mg status

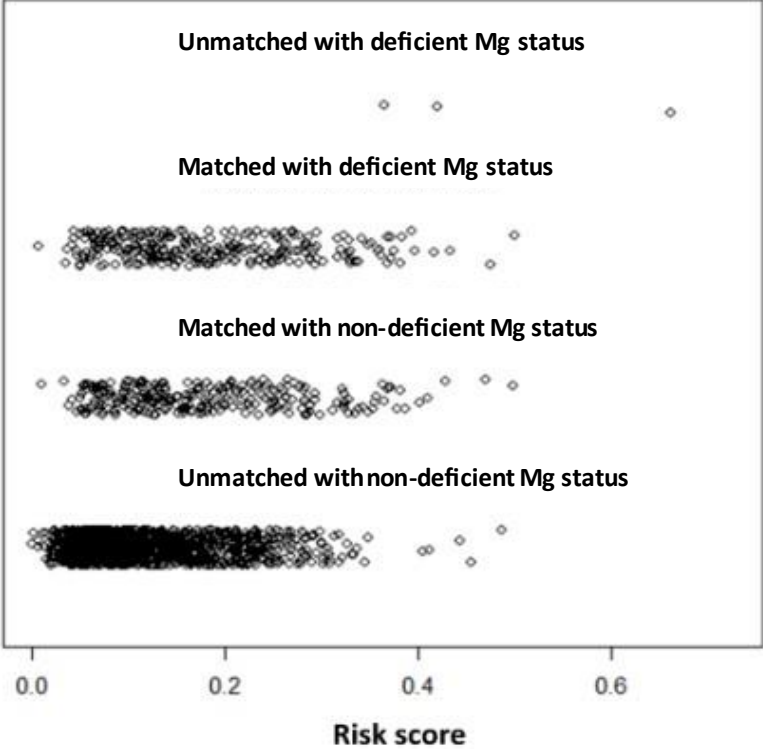

**Supplemental Table 1:** Summary of methods and test kits used for laboratory analysis and their reference range, and intra- and inter-assay coefficients of variation

| Parameter            | Method                                           | Analytical system                                                                | Provider                                 | Reference range     | Intra- and inter-assay CV |
|----------------------|--------------------------------------------------|----------------------------------------------------------------------------------|------------------------------------------|---------------------|---------------------------|
| Bilirubin, total     | DPD method                                       | BIL-T/Hitachi 717                                                                | Roche Mannheim, Germany                  | 0.2 – 1.0 mg/dl     | < 2.5% and <4%            |
| Calcium              | o-cresolphthalein-complex                        | CA/Hitachi 717                                                                   | Roche Mannheim, Germany                  | 2.1- 2.75 mmol/L    | < 2.5% and < 4%           |
| Cortisol             | Solid-phase chemiluminescence enzyme immunoassay | Cortisol-Immulinite®/ DPC Immulinite autosampler                                 | DPC Biermann GmbH Bad Nauheim, Germany   | 5-25 µg/dl          | both < 10%                |
| C-reactive protein   | Immunoturbidimetric assay                        | CRP/Hitachi 911                                                                  | Roche Mannheim, Germany                  | < 0.5 mg/dl         | 4.0% and 8.5%             |
| Creatinine           | Jaffé method (twin mode)                         | CREA/Hitachi 717                                                                 | Roche Mannheim, Germany                  | < 1.2 mg/dl         | <2.5% and < 4%            |
| Intact PTH           | Chemiluminescence enzyme immunoassay             | iPTH/Elecsys 2010                                                                | Roche Diagnostics GmbH Mannheim, Germany | 15-65 pg/mL         | both < 10%                |
| Phosphate, inorganic | Molybdate-reaction                               | PHOS/Hitachi 717                                                                 | Roche Mannheim, Germany                  | 0.97 – 1.62 mmol/L  | <2.5% and < 4%            |
| Sodium               | Ion selective electrode (ISE)                    | ISE diluent, ISE Internal Reference and Reference Electrode Solution/Hitachi 717 | Roche Diagnostics GmbH Mannheim, Germany | 137 – 147 mmol/L    | < 2.5% and < 4%           |
| Magnesium            | Colorimetric method                              | Cobas Mira Plus Roche autoanalyzer                                               | Roche Diagnostics GmbH Mannheim, Germany | see Methods section | both < 4%                 |

**Supplemental Table 2:** Vitamin D and magnesium status in the entire study cohort and according to different demographic, anthropometric, and clinical parameters

|                                      | Vitamin D deficient |  | Vitamin D insufficient | P-value | Magnesium deficient | Possibly magnesium deficient | P-value |
|--------------------------------------|---------------------|--|------------------------|---------|---------------------|------------------------------|---------|
| Entire cohort (n,%)                  | 780 (34.1)          |  | 736 (32.2)             | -       | 272 (11.9)          | 905 (39.6)                   | -       |
| Sex (n,%)                            |                     |  |                        | <0.001  |                     |                              | 0.008   |
| Males                                | 451 (29.1)          |  | 548 (35.0)             |         | 177 (11.1)          | 617 (38.7)                   |         |
| Females                              | 329 (44.6)          |  | 188 (29.3)             |         | 95 (13.7)           | 288 (41.6)                   |         |
| Age Group                            |                     |  |                        | <0.001  |                     |                              | 0.012   |
| < 50 Years                           | 88 (30.8)           |  | 89 (31.2)              |         | 31 (10.3)           | 127 (42.5)                   |         |
| 50-70 Years                          | 400 (29.4)          |  | 429 (33.4)             |         | 178 (13.0)          | 536 (39.1)                   |         |
| > 70 Years                           | 292 (45.3)          |  | 218 (31.8)             |         | 63 (10.2)           | 242 (39.3)                   |         |
| Body Mass Index                      |                     |  |                        | 0.030   |                     |                              | 0.54    |
| ≤ 30 kg/m <sup>2</sup>               | 303 (33.1)          |  | 300 (32.9)             |         | 207 (11.7)          | 689 (39.2)                   |         |
| >30 kg/m <sup>2</sup>                | 477 (37.6)          |  | 436 (34.1)             |         | 65 (12.6)           | 216 (46.7)                   |         |
| Diabetes Mellitus                    |                     |  |                        | <0.001  |                     |                              | <0.001  |
| Yes                                  | 194 (47.3)          |  | 110 (29.2)             |         | 202 (10.7)          | 747 (39.2)                   |         |
| No                                   | 586 (31.3)          |  | 626 (34.0)             |         | 70 (17.4)           | 158 (39.7)                   |         |
| Hypertension                         |                     |  |                        | <0.001  |                     |                              | 0.12    |
| Yes                                  | 485 (36.7)          |  | 383 (34.2)             |         | 168 (12.6)          | 532 (39.4)                   |         |
| No                                   | 295 (30.7)          |  | 353 (31.8)             |         | 104 (10.8)          | 374 (39.7)                   |         |
| Estimated Glomerular Filtration Rate |                     |  |                        | <0.001  |                     |                              | <0.001  |
| < 60 mL/min/1.73m <sup>2</sup>       | 121 (46.4)          |  | 78 (30.0)              |         | 25 (9.1)            | 80 (30.5)                    |         |
| ≥ 60 mL/min/1.73m <sup>2</sup>       | 659 (32.4)          |  | 658 (33.9)             |         | 247 (12.7)          | 825 (41.1)                   |         |
| C-reactive Protein                   |                     |  |                        | <0.001  |                     |                              | 0.029   |
| ≤ 5 mg/L                             | 357 (28.0)          |  | 411 (34.4)             |         | 161 (12.5)          | 527 (40.9)                   |         |
| > 5 mg/L                             | 423 (41.9)          |  | 325 (31.7)             |         | 111 (11.0)          | 378 (37.9)                   |         |

**Supplemental Table 3:** Results of bootstrapping for the primary endpoint 25-hydroxyvitamin D using 1,000 samples with random replacement

| Parameter                                              | Bootstrapped Difference | BCa 95% CI    | Standard Error | P-value |
|--------------------------------------------------------|-------------------------|---------------|----------------|---------|
| 25(OH)D (ng/mL)                                        |                         |               |                |         |
| Adequate vs. deficient/potentially deficient Mg status | 0.38                    | 0.62 to 1.24  | 0.47           | 0.51    |
| Deficient Mg status vs. non-deficient Mg status        | 1.45                    | -0.03 to 2.92 | 0.75           | 0.06    |

Abbreviations: 25(OH)D, 25-hydroxyvitamin D; BCa, bias corrected accelerated; CI, confidence interval

**Supplemental Table 4:** Characteristics of unmatched and matched study participants with deficient/non-deficient or adequate serum Mg status

| Parameter                            | Unmatched patients (n=2,286) |                                    |       | Matched patients (n=584)     |                                  |      |
|--------------------------------------|------------------------------|------------------------------------|-------|------------------------------|----------------------------------|------|
|                                      | Deficient Mg status<br>n=295 | Non-deficient Mg status<br>n=1,991 | SMD % | Deficient Mg status<br>n=292 | Non-deficient Mg status<br>n=292 | SMD% |
| Age (years)                          | 62.3 ± 9.9                   | 63.1 ± 10.7                        | 7.8   | 62.3 ± 9.9                   | 62.7 ± 10.4                      | 3.9  |
| Females                              | 108 (36.6)                   | 613 (30.8)                         | -17.5 | 108 (37.0)                   | 104 (35.5)                       | -4.1 |
| Body Mass Index (kg/m <sup>2</sup> ) | 27.7 ± 4.2                   | 27.4 ± 4.1                         | -7.2  | 27.7 ± 4.2                   | 27.7 ± 4.3                       | 0.0  |
| Season of Blood Sampling             |                              |                                    |       |                              |                                  |      |
| Winter                               | 128 (43.4)                   | 429 (21.5)                         | -73.7 | 126 (43.2)                   | 127 (43.5)                       | 1.4  |
| Spring                               | 55 (18.6)                    | 372 (18.7)                         | 0.4   | 55 (18.8)                    | 60 (17.1)                        | -6.2 |
| Summer                               | 64 (21.7)                    | 586 (29.4)                         | 23.5  | 64 (22.0)                    | 65 (22.3)                        | 1.3  |
| Fall                                 | 48 (16.3)                    | 604 (30.3)                         | -2.4  | 48 (16.4)                    | 50 (17.1)                        | 2.6  |
| Smoking                              | 178 (60.3)                   | 1278 (64.2)                        | 11.4  | 176 (60.3)                   | 176 (60.1)                       | 0.0  |
| Exercise (scale)                     | 5.8 ± 1.7                    | 5.9 ± 1.8                          | 5.7   | 5.8 ± 1.7                    | 5.8 ± 1.8                        | 0.0  |
| eGFR (ml/min/1.73 m <sup>2</sup> )   | 69 ± 16                      | 65 ± 15                            | -25.8 | 69 ± 15                      | 69 ± 15                          | 0.0  |
| Diagnosis                            |                              |                                    |       |                              |                                  |      |
| Diabetes mellitus                    | 74 (25.1)                    | 340 (17.1)                         | -29.2 | 72 (24.7)                    | 77 (26.3)                        | 5.4  |
| Hypertension                         | 181 (64.4)                   | 1141 (57.3)                        | -20.1 | 179 (61.3)                   | 175 (59.7)                       | -4.0 |
| Atrial Fibrillation                  | 44 (14.9)                    | 300 (15.1)                         | 0.8   | 43 (14.7)                    | 40 (13.7)                        | -4.0 |
| Biochemical Parameters               |                              |                                    |       |                              |                                  |      |
| Bilirubin (mg/dL)                    | 0.64 ± 0.38                  | 0.64 ± 0.39                        | 0.0   | 0.64 ± 0.38                  | 0.66 ± 0.55                      | 4.2  |
| Sodium (mmol/L)                      | 141 ± 3                      | 141 ± 3                            | 0.0   | 141 ± 3                      | 141 ± 3                          | 0.0  |
| Calcium (mmol/L)                     | 2.33 ± 0.11                  | 2.33 ± 0.10                        | 0.0   | 2.32 ± 0.10                  | 2.32 ± 0.11                      | 0.0  |
| Phosphate (mmol/L)                   | 1.12 ± 0.17                  | 1.14 ± 0.19                        | 11.1  | 1.12 ± 0.17                  | 1.11 ± 0.19                      | -5.5 |
| PTH (pg/mL)                          | 32 ± 16                      | 35 ± 33                            | 11.6  | 32 ± 16                      | 32 ± 17                          | 0.0  |
| C-reactive protein (mg/dL)           | 0.87 ± 1.75                  | 0.99 ± 1.95                        | 6.5   | 0.87 ± 1.76                  | 0.81 ± 1.44                      | -3.7 |
| Cortisol (µg/dL)                     | 22.2 ± 7.1                   | 22.6 ± 8.5                         | 5.1   | 22.1 ± 7.0                   | 22.5 ± 6.5                       | 5.9  |
| Medications                          |                              |                                    |       |                              |                                  |      |
| Beta-Blockers                        | 180 (61.0)                   | 1264 (63.5)                        | 7.3   | 180 (61.6)                   | 180 (61.4)                       | 0.0  |
| ACE-inhibitors/AT-blockers           | 172 (58.3)                   | 1150 (57.8)                        | -1.4  | 172 (58.9)                   | 173 (59.0)                       | 0.9  |
| Glucocorticoids                      | 4 (1.4)                      | 46 (2.3)                           | 7.1   | 4 (1.4)                      | 2 (0.7)                          | -7.6 |
| Statins                              | 128 (43.4)                   | 957 (48.1)                         | 13.2  | 128 (43.8)                   | 124 (42.3)                       | -4.0 |
| Digitoxin                            | 53 (18.0)                    | 295 (14.8)                         | -12.3 | 52 (17.8)                    | 55 (18.8)                        | 3.9  |
| Diuretics                            | 93 (31.5)                    | 564 (28.3)                         | -9.9  | 93 (31.8)                    | 92 (31.4)                        | 0.9  |
| Aspirin                              | 203 (68.8)                   | 1428 (71.7)                        | 9.0   | 202 (69.2)                   | 201 (68.6)                       | 0.9  |
| Antibiotics                          | 3 (1.0)                      | 36 (1.8)                           | 6.8   | 3 (1.0)                      | 4 (1.4)                          | 3.7  |

Abbreviations: eGFR, estimated glomerular filtration rate; PTH, parathyroid hormone; ACE, angiotensin converting enzyme; AT, angiotensin; SMD, standardized mean difference
